# Supplementary material
Source: publisher figshare collection journal article supplement (https://diabetesjournals.figshare.com/articles/dataset/_/15135006)
Supplement: Supplementary file 1 [file 1]

**Supplemental Table 5. Adjusted hazard ratios (95% CI) of early menopause (menopause <45 yrs) vs. normal menopause (menopause ≥45 yrs) and cardiovascular disease risk in women from ‘Other’ ethnicities**

|                      | <b>CHD</b>          | <b>Stroke</b>       | <b>ASCVD</b>        | <b>HF</b>           |
|----------------------|---------------------|---------------------|---------------------|---------------------|
| <b>All</b>           | 0.996 (0.848 1.169) | 1.000 (0.852 1.172) | 1.008 (0.857 1.187) | 0.979 (0.834 1.149) |
| <i>P-interaction</i> | 0.07                | 0.23                | 0.12                | 0.25                |
| <b>DM</b>            | 1.205 (0.800 1.815) | 1.150 (0.777 1.704) | 1.217 (0.804 1.843) | 1.109 (0.733 1.678) |
| <b>Non-DM</b>        | 0.943 (0.791 1.125) | 0.972 (0.816 1.159) | 0.961 (0.803 1.149) | 0.958 (0.804 1.142) |

T2DM: type 2 diabetes; White: non-Hispanic white; Black: non-Hispanic black. CHD: coronary heart disease; ASCVD: Atherosclerotic cardiovascular disease (CHD or stroke); HF: heart failure

HRs were adjusted for age, race, cohort indicator, education, smoking status, alcohol drinking status, BMI, mean blood pressure, mean total cholesterol, antihypertensive medication, lipid-lowering medication, ever used hormone therapy, pregnancy history, and diabetes.
