# Supplementary material
Source: publisher figshare collection journal article supplement (https://diabetesjournals.figshare.com/articles/dataset/_/15135006)
Supplement: Supplementary file 2 [file 1]

**Supplemental Table 4. Age and race-adjusted hazard ratios (95% CI) of early menopause (menopause <45 yrs) vs. normal menopause (menopause ≥45 yrs) and cardiovascular disease risk**

|                 | <b>CHD</b>                   | <b>Stroke</b>                | <b>ASCVD</b>                 | <b>HF</b>                   |
|-----------------|------------------------------|------------------------------|------------------------------|-----------------------------|
| <b>Combined</b> |                              |                              |                              |                             |
| <b>All</b>      | <b>1.148 (1.096 1.202)**</b> | <b>1.173 (1.121 1.226)**</b> | <b>1.169 (1.114 1.226)**</b> | <b>1.141 (1.088 1.196)*</b> |
| <b>T2DM</b>     | <b>1.148 (1.005 1.310)*</b>  | <b>1.222 (1.079 1.384)*</b>  | <b>1.195 (1.039 1.375)*</b>  | <b>1.177 (1.022 1.356)*</b> |
| <b>Non-T2DM</b> | <b>1.138 (1.083 1.195)*</b>  | <b>1.154 (1.100 1.212)*</b>  | <b>1.156 (1.099 1.216)**</b> | <b>1.130 (1.074 1.188)*</b> |
| <b>White</b>    |                              |                              |                              |                             |
| <b>All</b>      | <b>1.171 (1.101 1.246)*</b>  | <b>1.186 (1.117 1.259)*</b>  | <b>1.179 (1.106 1.257)*</b>  | <b>1.165 (1.094 1.241)*</b> |
| <b>T2DM</b>     | 0.978 (0.768 1.244)          | 1.151 (0.934 1.418)          | <b>1.029 (0.801 1.323)*</b>  | 0.995 (0.776 1.276)         |
| <b>Non-T2DM</b> | <b>1.181 (1.107 1.259)*</b>  | <b>1.182 (1.110 1.258)*</b>  | <b>1.185 (1.109 1.266)*</b>  | <b>1.171 (1.097 1.250)*</b> |
| <b>Black</b>    |                              |                              |                              |                             |
| <b>All</b>      | <b>1.078 (0.996 1.166)*</b>  | <b>1.108 (1.025 1.198)*</b>  | 1.118 (1.030 1.214)*         | <b>1.084 (1.000 1.176)*</b> |
| <b>T2DM</b>     | 1.175 (0.984 1.403)          | <b>1.219 1.023 1.451)*</b>   | 1.232 (1.017 1.492)*         | <b>1.255 (1.030 1.530)*</b> |
| <b>Non-T2DM</b> | 1.048 (0.959 1.145)          | 1.075 (0.985 1.173)          | 1.085 (0.991 1.189)          | 1.040 (0.950 1.138)         |
| <b>Others</b>   |                              |                              |                              |                             |
| <b>All</b>      | 0.979 (0.838 1.144)          | 0.996 (0.853 1.162)          | 0.990 (0.845 1.160)          | 0.960 (0.823 1.121)         |
| <b>T2DM</b>     | 1.323 (0.904 1.936)          | 1.194 (0.827 1.725)          | 1.307 (0.887 1.926)          | 1.145 (0.778 1.685)         |
| <b>Non-T2DM</b> | 0.912 (0.768 1.083)          | 0.945 (0.796 1.121)          | 0.928 (0.779 1.105)          | 0.926 (0.781 1.099)         |

T2DM: type 2 diabetes; White: non-Hispanic white; Black: non-Hispanic black. CHD: coronary heart disease; ASCVD: Atherosclerotic cardiovascular disease (CHD or stroke); HF: heart failure

\*\*P<0.0001; \*P<0.05
