# Supplementary material
Source: publisher figshare collection journal article supplement (https://diabetesjournals.figshare.com/articles/dataset/_/15135006)
Supplement: Supplementary file 3 [file 1]

**Supplemental Table 6. Adjusted hazard ratios (95% CI) of early menopause (menopause <45 yrs) vs. normal menopause (menopause ≥45 yrs) and cardiovascular disease risk in women under 70 years old (n=7989)**

|                      | <b>CHD</b>                         | <b>Stroke</b>                      | <b>ASCVD</b>                       | <b>HF</b>                          |
|----------------------|------------------------------------|------------------------------------|------------------------------------|------------------------------------|
|                      | <b>HR (95% CI)<sup>&amp;</sup></b> | <b>HR (95% CI)<sup>&amp;</sup></b> | <b>HR (95% CI)<sup>&amp;</sup></b> | <b>HR (95% CI)<sup>&amp;</sup></b> |
| <b>All</b>           | <b>1.097 (1.037 1.161)*</b>        | <b>1.095 (1.036 1.157)*</b>        | <b>1.103 (1.041 1.169)*</b>        | <b>1.071 (1.014 1.132)*</b>        |
| <i>P-interaction</i> | 0.13                               | 0.11                               | 0.12                               | 0.25                               |
| <b>T2DM</b>          | <b>1.301 (1.090 1.553)*</b>        | <b>1.239 (1.051 1.461)*</b>        | <b>1.327 (1.104 1.596)*</b>        | 1.154 (0.975 1.366)                |
| <b>Non-T2DM</b>      | <b>1.073 (1.010 1.139)*</b>        | <b>1.072 (1.012 1.137)*</b>        | <b>1.077 (1.013 1.146)*</b>        | 1.058 (0.997 1.121)                |

T2DM: type 2 diabetes; White: non-Hispanic white; Black: non-Hispanic black. CHD: coronary heart disease; ASCVD: Atherosclerotic cardiovascular disease (CHD or stroke); HF: heart failure

\*P<0.05

<sup>&</sup>HRs were adjusted for age, race, cohort indicator, education, smoking status, alcohol drinking, BMI, mean blood pressure, mean total cholesterol, antihypertensive medication, lipid-lowering medication, ever used hormone therapy, pregnancy history, and T2DM.
