# Supplementary material
Source: publisher figshare collection journal article supplement (https://diabetesjournals.figshare.com/articles/dataset/_/15135006)
Supplement: Supplementary file 4 [file 1]

**Supplemental Table 1. Baseline characteristics of postmenopausal women by T2DM and race**

|                                         | Non-Hispanic White |              |                   |         | Non-Hispanic Black |              |                   |         | Others      |              |                  |         |
|-----------------------------------------|--------------------|--------------|-------------------|---------|--------------------|--------------|-------------------|---------|-------------|--------------|------------------|---------|
|                                         | All (n=5391)       | T2DM (n=436) | Non-T2DM (n=4955) | P-value | All (n=3016)       | T2DM (n=641) | Non-T2DM (n=2375) | P-value | All (n=967) | T2DM (n=160) | Non-T2DM (n=807) | P-value |
| <b>Age (mean±SD, years)</b>             | 57.0±7.7           | 57.6±7.1     | 56.9±7.7          | 0.09    | 57.0±8.8           | 58.0±8.0     | 56.8±9.0          | 0.002   | 64.2±9.4    | 66.3±9.3     | 63.8±9.4         | 0.003   |
| <b>Education (n,%)</b>                  |                    |              |                   | <0.0001 |                    |              |                   | <0.0001 |             |              |                  |         |
| ≤high school                            | 2929 (54.4)        | 304 (69.7)   | 2625 (53.0)       |         | 1452 (48.3)        | 377 (58.9)   | 1075 (45.4)       |         | 646 (66.8)  | 123 (76.9)   | 523 (64.8)       | 0.003   |
| >high school                            | 2457 (45.6)        | 132 (30.3)   | 2325 (47.0)       |         | 1554 (51.7)        | 263 (41.1)   | 1291 (54.6)       |         | 321 (33.2)  | 37 (23.1)    | 284 (35.2)       |         |
| <b>BMI</b>                              |                    |              |                   |         |                    |              |                   |         |             |              |                  |         |
| BMI (mean±SD, kg/m <sup>2</sup> )       | 27.0±5.6           | 31.4±6.6     | 26.4±5.3          | <0.0001 | 31.4±6.6           | 33.6±6.5     | 30.8±6.5          | <0.0001 | 27.8±5.6    | 30.2±6.6     | 27.3±5.2         | <0.0001 |
| BMI≥30 (%)                              | 1349 (25.0)        | 228 (52.4)   | 1121 (22.6)       | <0.0001 | 1616 (53.6)        | 439 (68.6)   | 1177 (49.6)       | <0.0001 | 298 (30.8)  | 80 (50.0)    | 218 (27.0)       | <0.0001 |
| <b>Blood pressure</b>                   |                    |              |                   |         |                    |              |                   |         |             |              |                  |         |
| SBP (mean±SD, mmHg)                     | 121.1±19.5         | 129.2±20.1   | 120.4±19.3        | <0.0001 | 131.0±21.5         | 135.5±23.4   | 129.7±20.8        | <0.0001 | 129.4±24.0  | 135.7±23.7   | 128.1±23.9       | 0.0002  |
| DBP (mean±SD, mmHg)                     | 69.0±9.9           | 68.9±10.4    | 69.0±9.9          | 0.87    | 75.5±10.6          | 74.6±10.9    | 75.7±10.5         | 0.02    | 68.8±10.1   | 66.9±9.1     | 69.2±10.2        | 0.01    |
| SBP≥140 or DBP≥90 mmHg (n,%)            | 1827 (33.9)        | 239 (55.0)   | 1588 (32.1)       | <0.0001 | 1403 (46.6)        | 380 (59.4)   | 1023 (43.1)       | <0.0001 | 305 (31.5)  | 61 (38.1)    | 244 (30.2)       | 0.05    |
| <b>Cholesterol</b>                      |                    |              |                   |         |                    |              |                   |         |             |              |                  |         |
| Total cholesterol (mean±SD, mg/dL)      | 216.0±40.6         | 220.1±49.4   | 215.7±39.8        | 0.03    | 208.8±42.1         | 210.7±45.7   | 208.4±41.2        | 0.23    | 201.5±35.7  | 197.1±40.7   | 202.4±34.6       | 0.09    |
| Total cholesterol≥200 mg/dL (n,%)       | 3451 (64.0)        | 274 (63.0)   | 3177 (64.1)       | 0.23    | 1626 (55.1)        | 346 (57.3)   | 1280 (54.6)       | 0.63    | 465 (48.1)  | 69 (43.1)    | 396 (49.1)       | 0.17    |
| <b>Current smoking (n,%)</b>            | 1124 (20.9)        | 78 (17.9)    | 1046 (21.1)       | 0.11    | 516 (17.1)         | 88 (13.7)    | 428 (18.1)        | 0.01    | 69 (7.1)    | 10 (6.3)     | 59 (7.3)         | 0.63    |
| <b>Current alcohol drinking (n,%)</b>   | 3381 (62.7)        | 180 (41.3)   | 3201 (64.6)       | <0.0001 | 986 (32.7)         | 138 (21.5)   | 848 (35.7)        | <0.0001 | 697 (72.1)  | 89 (55.6)    | 608 (75.3)       | <0.0001 |
| <b>Menopausal age (mean±SD, years)</b>  | 46.1±6.2           | 45.4±6.6     | 46.1±6.2          | 0.09    | 43.6±8.2           | 43.6±8.3     | 43.6±8.2          | 0.002   | 47.7±5.9    | 47.3±6.5     | 47.8±5.8         | 0.003   |
| <b>Early menopause (≤45 years, n,%)</b> | 1813 (33.6)        | 166 (38.1)   | 1647 (33.2)       | 0.04    | 1419 (47.2)        | 304 (47.6)   | 1115 (47.1)       | 0.83    | 215 (22.2)  | 41 (25.6)    | 174 (21.6)       | 0.26    |
| <b>Menopausal type (n,%)</b>            |                    |              |                   | 0.49    |                    |              |                   | 0.10    |             |              |                  | 0.18    |
| Natural                                 | 3639 (67.5)        | 298 (68.4)   | 3341 (67.4)       |         | 1369 (45.4)        | 289 (45.1)   | 1080 (45.5)       | 0.03    | 749 (77.5)  | 116 (72.5)   | 633 (78.4)       |         |
| Surgical                                | 1716 (31.8)        | 137 (31.4)   | 1579 (31.9)       |         | 1607 (53.3)        | 338 (52.7)   | 1269 (53.4)       |         | 196 (20.3)  | 41 (25.6)    | 155 (19.2)       |         |
| Not specified                           | 36 (0.7)           | 1 (0.2)      | 35 (0.7)          |         | 40 (1.3)           | 14 (2.2)     | 26 (1.1)          |         | 22 (2.3)    | 3 (1.9)      | 19 (2.4)         |         |
| <b>Ever used hormone therapy (n,%)</b>  | 3173 (59.1)        | 235 (54.4)   | 2938 (59.5)       | 0.009   | 1499 (50.0)        | 300 (47.1)   | 1199 (50.8)       | 0.002   | 379 (39.2)  | 56 (35.0)    | 323 (40.0)       | 0.23    |
| <b>Ever pregnant (n,%)</b>              | 4913 (91.1)        | 407 (93.4)   | 4506 (90.9)       | 0.09    | 2806 (93.2)        | 601 (93.9)   | 2205 (93.0)       | 0.42    | 890 (92.0)  | 150 (93.8)   | 740 (91.7)       | 0.38    |

T2DM: type 2 diabetes. Missing n for covariates: education 15, smoking 4, BMI 5, Blood pressure 10, cholesterol 69, antihypertensive medication 11, lipids-lowering medication 40, Ever used hormone therapy 43 and ever pregnant 5.
