# Supplementary material
Source: publisher figshare collection journal article supplement (https://diabetesjournals.figshare.com/articles/dataset/_/15135006)
Supplement: Supplementary file 5 [file 1]

**Supplemental table 7. Adjusted hazard ratios (95% CI) of early menopause (menopause <45 yrs) vs. normal menopause (menopause ≥45 yrs) and cardiovascular disease risk by fasting glucose level**

|               | <b>Fasting glucose &lt;100 mg/dL (n=6,661)</b> | <b>Fasting glucose 100-125 mg/dL (n=2,002)</b> | <b>Fasting glucose ≥126 mg/dL (n=666)</b> |
|---------------|------------------------------------------------|------------------------------------------------|-------------------------------------------|
|               | <b>HR (95% CI) &amp;</b>                       | <b>HR (95% CI) &amp;</b>                       | <b>HR (95% CI) &amp;</b>                  |
| <b>CHD</b>    | <b>1.100 (1.035 1.169)*</b>                    | <b>1.127 (1.002 1.268)*</b>                    | <b>1.337 (1.024 1.745)*</b>               |
| <b>Stroke</b> | <b>1.081 (1.018 1.148)*</b>                    | <b>1.211 (1.081 1.356)*</b>                    | 1.256 (0.984 1.602)                       |
| <b>ASCVD</b>  | <b>1.096 (1.029 1.166)*</b>                    | <b>1.184 (1.048 1.338)*</b>                    | <b>1.399 (1.050 1.864)*</b>               |
| <b>HF</b>     | <b>1.068 (1.006 1.134)*</b>                    | <b>1.159 (1.036 1.298)*</b>                    | 1.237 (0.954 1.603)                       |

&HRs were adjusted for age, race, cohort indicator, education, smoking status, alcohol drinking, BMI, mean blood pressure, mean total cholesterol, antihypertensive medication, lipid-lowering medication, ever used hormone therapy, pregnancy history, and diabetes.

\*P<0.05
