# Supplementary material
Source: publisher figshare collection journal article supplement (https://diabetesjournals.figshare.com/articles/dataset/_/15135006)
Supplement: Supplementary file 6 [file 1]

**Supplemental Table 2. Baseline characteristics in early vs. normal age menopause**

|                                          | <b>Early menopause (n=3447)</b> | <b>Normal age menopause (n=5920)</b> | <b>P</b> |
|------------------------------------------|---------------------------------|--------------------------------------|----------|
| <b>Age (mean±SD, years)</b>              | 55.7±8.4                        | 58.9±8.4                             | <0.0001  |
| <b>Race/ethnicity (n,%)</b>              |                                 |                                      | <0.0001  |
| Non-Hispanic white                       | 1813 (52.6)                     | 3578 (60.4)                          |          |
| Non-Hispanic black                       | 1419 (41.2)                     | 1590 (26.9)                          |          |
| Others                                   | 215 (6.2)                       | 752 (12.7)                           |          |
| <b>Education (n,%)</b>                   |                                 |                                      | <0.0001  |
| ≤high school                             | 1950 (56.6)                     | 3075 (52.0)                          |          |
| >high school                             | 1493 (43.36)                    | 2834 (48.0)                          |          |
| <b>Current smoking (n,%)</b>             | 797 (23.1)                      | 912 (15.4)                           | <0.0001  |
| <b>Current alcohol drinking (n,%)</b>    | 1657 (48.1)                     | 3402 (57.5)                          | <0.0001  |
| <b>T2DM (n, %)</b>                       | 511 (14.8)                      | 724 (12.2)                           | 0.0003   |
| <b>BMI</b>                               |                                 |                                      |          |
| BMI (mean±SD, kg/m <sup>2</sup> )        | 28.8±6.5                        | 28.3±6.1                             | 0.0001   |
| BMI≥30 (n,%, kg/m <sup>2</sup> )         | 1260 (36.6)                     | 1999 (33.8)                          | 0.006    |
| <b>Blood pressure</b>                    |                                 |                                      |          |
| SBP (mean±SD, mmHg)                      | 123.8±20.9                      | 125.9±21.3                           | <0.0001  |
| DBP (mean±SD, mmHg)                      | 71.7±10.8                       | 70.7±10.4                            | <0.0001  |
| SBP≥140 or DBP≥90 mmHg (n,%)             | 1227 (35.6)                     | 2304 (39.0)                          | 0.0014   |
| <b>Cholesterol</b>                       |                                 |                                      |          |
| Total cholesterol (mean±SD, mg/dL)       | 212.8±42.6                      | 211.9±39.9                           | 0.2822   |
| Total cholesterol≥200 mg/dL (n,%)        | 2023 (59.3)                     | 3516 (59.7)                          | 0.7125   |
| <b>Antihypertensive medication (n,%)</b> | 1156 (33.6)                     | 2008 (34.0)                          | 0.7052   |
| <b>Lipids-lowering medication (n,%)</b>  | 858 (25.02)                     | 1436 (24.6)                          | 0.4657   |
| <b>Menopausal age (mean± SD, years)</b>  | 38.0±4.9                        | 49.8±3.4                             | <0.0001  |
| <b>Menopausal type (n,%)</b>             |                                 |                                      | <0.0001  |
| Natural                                  | 1161 (33.7)                     | 4589 (77.5)                          |          |
| Surgical                                 | 2244 (65.10)                    | 1275 (21.5)                          |          |
| Not specified                            | 42 (1.2)                        | 56 (1.0)                             |          |
| <b>Ever used hormone therapy (n,%)</b>   | 1890 (55.0)                     | 3158 (53.6)                          | 0.1054   |
| <b>Ever pregnant (n,%)</b>               | 3174 (92.1)                     | 5429 (91.8)                          | 0.5149   |

T2DM: type 2 diabetes. Missing n for covariates: education 15, smoking 4, BMI 5, Blood pressure 10, cholesterol 69, antihypertensive medication 11, lipids-lowering medication 40, Ever used hormone therapy 43 and ever pregnant 5.
