# Supplementary material
Source: publisher figshare collection journal article supplement (https://diabetesjournals.figshare.com/articles/dataset/_/15135006)
Supplement: Supplementary file 9 [file 1]

**Supplemental Table 3. Baseline characteristics in ARIC, MESA and JHS**

|                                            | <b>ARIC (n=5868)</b> | <b>MESA (n=2877)</b> | <b>JHS (n=629)*</b> | <b>P</b> |
|--------------------------------------------|----------------------|----------------------|---------------------|----------|
| <b>Age (mean±SD, years)</b>                | 54.5±5.6             | 64.7±9.2             | 55.3±9.6            | <0.0001  |
| <b>Race/ethnicity (n,%)</b>                |                      |                      |                     | <0.0001  |
| Non-Hispanic white                         | 4286 (73.0)          | 1105 (38.4)          | NA                  |          |
| Non-Hispanic black                         | 1582 (27.0)          | 805 (28.0)           | 629 (100.0)         |          |
| Others                                     | NA                   | 967 (33.6)           | NA                  |          |
| <b>Education (n,%)</b>                     | 5864                 | 2867                 | 628                 | <0.0001  |
| ≤high school                               | 3593 (61.3)          | 1229 (42.9)          | 205 (32.6)          |          |
| >high school                               | 2271 (38.7)          | 1638 (57.1)          | 423 (67.4)          |          |
| <b>Current smoking (n,%)</b>               | 1338 (22.8)          | 316 (11.0)           | 55 (8.8)            | <0.0001  |
| <b>Current alcohol drinking (n,%)</b>      | 2815 (48.0)          | 2008 (69.8)          | 241 (38.3)          | <0.0001  |
| <b>BMI</b>                                 |                      |                      |                     |          |
| BMI (mean±SD, kg/m <sup>2</sup> )          | 28.0±6.1             | 28.6±6.0             | 33.3±7.4            | <0.0001  |
| BMI≥30 (n,%, kg/m <sup>2</sup> )           | 1846 (31.5)          | 1012 (35.2)          | 405 (64.5)          | <0.0001  |
| <b>Blood pressure</b>                      |                      |                      |                     |          |
| SBP (mean±SD, mmHg)                        | 122.9±20.0           | 129.4±23.5           | 126.5±16.8          | <0.0001  |
| DBP (mean±SD, mmHg)                        | 71.5±10.8            | 69.2±10.3            | 75.6±8.5            | <0.0001  |
| SBP≥140 or DBP≥90 mmHg (n,%)               | 2535 (43.3)          | 879 (30.6)           | 121 (19.2)          | <0.0001  |
| <b>Cholesterol</b>                         |                      |                      |                     |          |
| Total cholesterol (mean±SD, mg/dL)         | 218.4±42.3           | 201.5±35.7           | 203.5±38.6          | <0.0001  |
| Total cholesterol≥200 mg/dL (n,%)          | 3829 (65.5)          | 1422 (49.5)          | 291 (49.3)          | <0.0001  |
| <b>T2DM (n, %)</b>                         | 750 (12.8)           | 358 (12.4)           | 129 (20.5)          | <0.0001  |
| <b>Anti-hypertensive medication (n,%)</b>  | 1610 (27.4)          | 1211 (42.1)          | 346 (55.8)          | <0.0001  |
| <b>Lipids-lowering medication (n,%)</b>    | 1703 (29.2)          | 531 (18.5)           | 60 (9.7)            | <0.0001  |
| <b>Menopausal age (mean± SD, years)</b>    | 45.3±6.8             | 47.6±6.4             | 41.6±8.9            | <0.0001  |
| <b>Early menopause (&lt;45 years, n,%)</b> | 2402 (41.0)          | 685 (23.8)           | 360 (57.9)          | <0.0001  |
| <b>Menopausal type (n,%)</b>               |                      |                      |                     | <0.0001  |
| Natural                                    | 3503 (59.7)          | 2048 (71.2)          | 206 (32.8)          |          |
| Surgical                                   | 2336 (39.8)          | 766 (26.6)           | 417 (66.3)          |          |
| Not specified                              | 29 (0.5)             | 63 (2.2)             | 6 (0.95)            |          |
| <b>Ever used hormone therapy (n,%)</b>     | 3235 (55.5)          | 1493 (51.9)          | 323 (51.4)          | <0.0001  |
| <b>Ever pregnant (n,%)</b>                 | 5497 (93.7)          | 2531 (88.0)          | 581 (92.4)          | <0.0001  |

\*JHS only included non-Hispanic Black participants. T2DM: type 2 diabetes. Missing n for covariates: education 15, smoking 4, BMI 5, Blood pressure 10, cholesterol 69, antihypertensive medication 11, lipids-lowering medication 40, Ever used hormone therapy 43 and ever pregnant 5.
