# Supplementary material
Source: publisher figshare collection journal article supplement (https://diabetesjournals.figshare.com/articles/dataset/_/15135006)
Supplement: Supplementary file 10 [file 1]

**Supplemental Table 8. Adjusted hazard ratios (95% CI) of early menopause (menopause <45 yrs) vs. normal menopause (menopause ≥45 yrs) and cardiovascular disease risk by cohort**

|                       | <b>CHD</b>                         | <b>Stroke</b>               | <b>ASCVD</b>                 | <b>HF</b>                   |
|-----------------------|------------------------------------|-----------------------------|------------------------------|-----------------------------|
|                       | <b>HR<sup>&amp;</sup> (95% CI)</b> | <b>HR (95% CI)</b>          | <b>HR (95% CI)</b>           | <b>HR (95% CI)</b>          |
| <b>ARIC</b>           |                                    |                             |                              |                             |
| <b>All</b>            | <b>1.111 (1.035 1.193)*</b>        | <b>1.104 (1.031 1.181)*</b> | <b>1.108 (1.035 1.186) *</b> | 1.095 (1.023 1.172)         |
| <i>P</i> -interaction | 0.91                               | 0.97                        | 0.56                         | 0.83                        |
| <b>T2DM</b>           | <b>1.276 (1.00 1.640)*</b>         | 1.170 (0.937 1.461)         | 1.215 (0.969 1.524)          | 1.151 (0.915 1.447)         |
| Non-T2DM              | <b>1.100 (1.021 1.185)*</b>        | <b>1.094 (1.018 1.176)*</b> | <b>1.104 (1.028 1.186)*</b>  | 1.091 (1.016 1.172)         |
| <b>MESA</b>           |                                    |                             |                              |                             |
| <b>All</b>            | <b>1.113 (1.016 1.219)*</b>        | <b>1.133 (1.035 1.240)*</b> | <b>1.130 (1.032 1.237)*</b>  | <b>1.105 (1.009 1.210)*</b> |
| <i>P</i> -interaction | 0.14                               | 0.21                        | 0.14                         | 0.11                        |
| <b>T2DM</b>           | 1.205 (0.936 1.551)                | 1.198 (0.935 1.535)         | 1.224 (0.956 1.568)          | 1.214 (0.949 1.554)         |
| <b>Non-T2DM</b>       | 1.096 (0.993 1.209)                | <b>1.118 (1.014 1.233)*</b> | <b>1.112 (1.008 1.226)*</b>  | 1.087 (0.985 1.199)         |
| <b>JHS</b>            |                                    |                             |                              |                             |
| <b>All</b>            | 1.025 (0.839 1.251)                | 1.027 (0.841 1.254)         | 1.031 (0.846 1.258)          | 0.974 (0.797 1.191)         |
| <i>P</i> -interaction | 0.21                               | 0.09                        | 0.15                         | 0.34                        |
| <b>T2DM</b>           | <b>1.979 (1.068 3.668)*</b>        | <b>2.001 (1.064 3.764)*</b> | <b>1.908 (1.044 3.485)*</b>  | 1.680 (0.902 3.130)         |
| <b>Non-T2DM</b>       | 0.934 (0.752 1.161)                | 0.932 (0.751 1.157)         | 0.939 (0.756 1.166)          | 0.908 (0.731 1.128)         |

T2DM: type 2 diabetes; CHD: coronary heart disease; ASCVD: Atherosclerotic cardiovascular disease (CHD or stroke); HF: heart failure

<sup>&</sup>HRs were adjusted for age, race, cohort indicator, education, smoking status, alcohol drinking status, BMI, mean blood pressure, mean total cholesterol, antihypertensive medication, lipid-lowering medication, ever used hormone therapy, pregnancy history, and diabetes.

\*P<0.05
